# Supplementary material
Source: publisher figshare collection journal article supplement (https://acs.figshare.com/ndownloader/files/15293975)
Supplement: Supplementary file 1 [file 15293975]

## Supporting Information

# Mechanistic Investigation with Kinetic Parameters on Water Oxidation Catalyzed by Manganese Oxide Nanoparticles Film

Hongmin Seo<sup>†</sup>, Kyoungsuk Jin<sup>†</sup>, Sunghak Park<sup>†</sup>, Kang Hee Cho<sup>†</sup>, Heonjin Ha<sup>†</sup>, Kang-Gyu Lee<sup>†</sup>, Yoon Ho Lee<sup>†</sup>, Dang Thanh Nguyen<sup>‡</sup>, Hyacinthe Randriamahazaka<sup>#</sup>, Jong-Sook Lee<sup>\*,‡</sup>, and Ki Tae Nam<sup>\*,†</sup>

<sup>†</sup>Department of Materials Science and Engineering, 1 Gwanak-ro, Gwanak-gu, Seoul 08826, Korea

<sup>‡</sup>School of Materials Science and Engineering, Chonnam National University, 77 Yongbong-ro, Buk-gu, Gwangju, 61186, Korea

<sup>#</sup>Université Paris Diderot, Sorbonne Paris Cité, ITODYS, UMR 7086 CNRS, SIELE Group, 15 rue Jean Antoine de Baïf, 75013 Paris, France

## Supporting Information Content

Pages: S1-S9

Figures: S1-S4

Table: S1

E-mail: jongsook@jnu.ac.kr, nkitae@snu.ac.kr

## **1. Materials and basic characterization**

### **1. Materials**

Mn(CH<sub>3</sub>COO)<sub>3</sub>·4H<sub>2</sub>O (99 %), 1-octadecene (90%), myristic acid (CH<sub>3</sub>(CH<sub>2</sub>)<sub>12</sub>COOH) (99%), decanol (CH<sub>3</sub>(CH<sub>2</sub>)<sub>9</sub>OH), Na<sub>2</sub>HPO<sub>4</sub>·7H<sub>2</sub>O (ACS reagent, 98.0-102.0 %), and NaH<sub>2</sub>PO<sub>4</sub>·2H<sub>2</sub>O (99.0 %) were purchased from Sigma Aldrich and used as received without further purification. Fluorine-doped-tin-oxide-coated glass (FTO, TEC-8) with the surface resistivity of 15 Ω sq<sup>-1</sup> was manufactured by Pilkington Company.

### **2. Scanning electron microscopy (SEM)**

The morphology of the p-MnO NPs films on the FTO substrates was characterized with a high resolution scanning electron microscope (Supra 55VP, Carl Zeiss, Germany). After deposition of the MnO NPs, the substrate was gently rinsed in deionized water at least 3 times and dried with nitrogen gas. Images were taken with an acceleration voltage of 2 kV, and EDX spectra with a 15 kV.

### **3. Transmission electron microscopy (TEM)**

TEM images and selected area electron diffraction (SAED) patterns were obtained using a high resolution transmission electron microscope (JEM-3000F, JEOL, Japan) with the acceleration voltage of 300 kV. To prepare TEM samples, the MnO NPs dispersed in hexane were dropped on the TEM grid and dried in air.

## 2. Estimation of turnover frequency (TOF) for 300 nm-thickness p-MnO NPs

The number of active sites for 300 nm-thickness p-MnO NPs film was calculated with the assumption that all Mn atoms on the surface of nanoparticles serve as the active sites. The number of active sites for 300 nm-thickness MnO NPs film was calculated by the following equation with assumption that the surface of p-MnO NPs was (100) facet. The crystal structure and lattice parameter for MnO were face-centered cubic structure and  $4.43 \times 10^{-8}$  cm.

$$\begin{aligned} \text{(The number of active sites)} &= (ECSA) \times (\text{the moles of Mn atoms} / \text{cm}^2) \\ &= (147.8) \times \left( \frac{2}{(4.43 \times 10^{-8})^2 \times (6.02 \times 10^{23})} \right) \\ &= 2.502 \times 10^{-7} \text{ moles} / \text{cm}^2 \end{aligned} \quad (S1)$$

TOF at 1.35 V vs. NHE can be calculated by calculated by the following equation based on the above values.

$$\begin{aligned} \text{(TOF)} &= \frac{(\text{current denistiy at } 1.35 \text{ V vs. NHE})}{4 \cdot F \cdot (\text{the number of active sites})} \\ &= \frac{0.00496 \text{ A/cm}^2}{4 \cdot (96485 \text{ A}\cdot\text{s} / \text{mol}) \cdot (2.502 \times 10^{-7} \text{ moles} / \text{cm}^2)} = 0.052 \text{ s}^{-1} \end{aligned} \quad (S2)$$

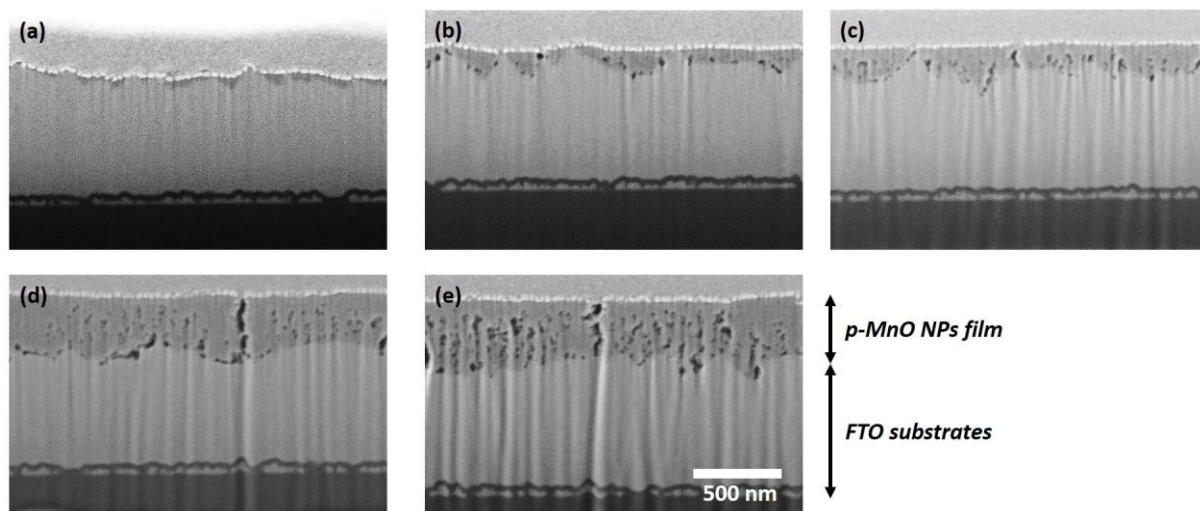

**Figure S1.** Cross-sectional scanning electron microscopy (SEM) images for p-MnO NPs films on FTO substrates for (a) 20 nm- (b) 70 nm- (c) 150 nm- (d) 300 nm- and (e) 500 nm-thickness

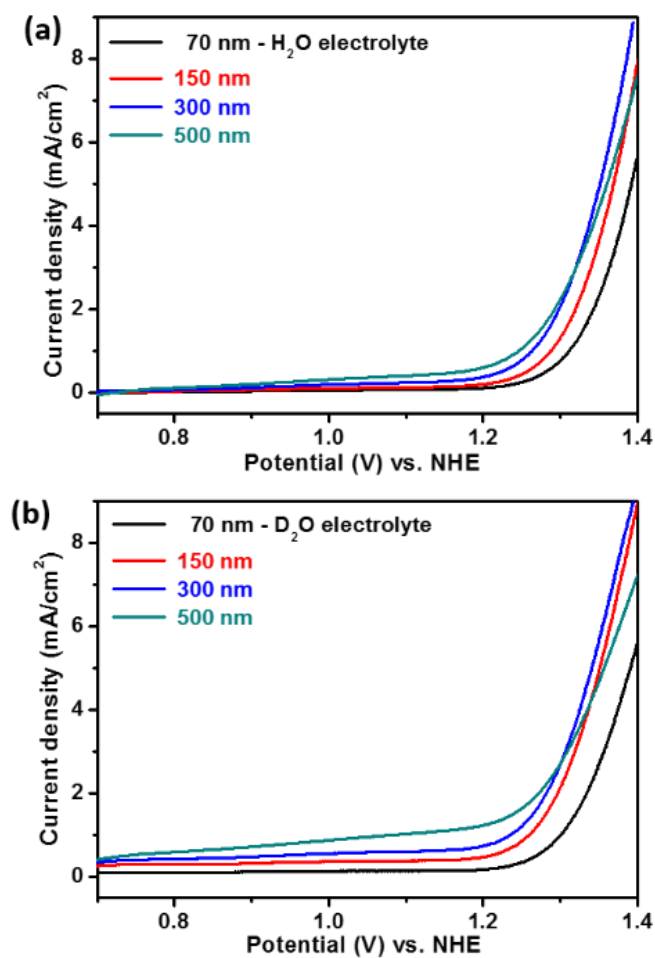

**Figure S2.** Polarization-corrected cyclic voltammetry curves from 0.7 V to 1.4 V vs. NHE for p-MnO NPs film of various thicknesses (70, 150, 300 and 500 nm) at 0.5M phosphate buffer solution under pH 7. (a) H<sub>2</sub>O electrolyte (b) D<sub>2</sub>O electrolyte

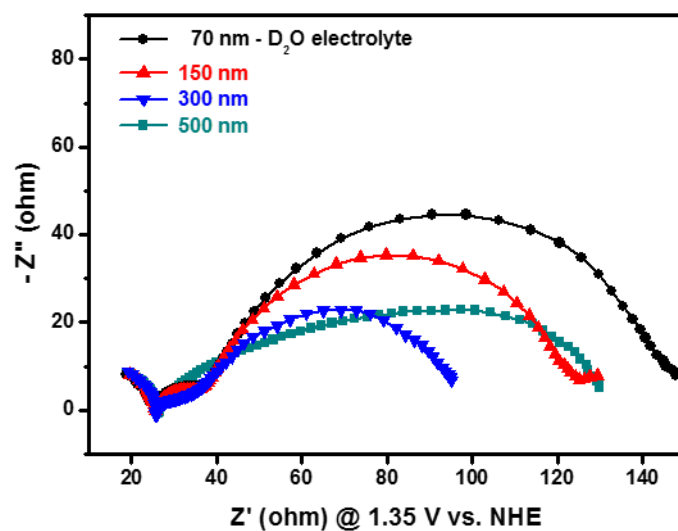

**Figure S3.** Nyquist plots for several thickness (70, 150, 300 and 500 nm) of p-MnO NPs film at 1.35 V vs. NHE in D<sub>2</sub>O electrolyte. The black, red, blue and dark cyan spectra were for 70, 150, 300 and 500 nm-thickness, respectively

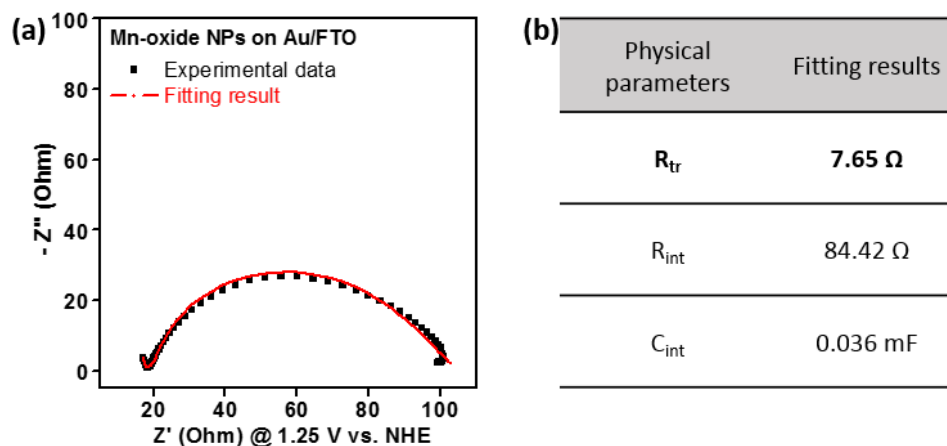

**Figure S4.** (a) Nyquist plot for 150 nm-thickness Mn-oxide NPs film on Au/FTO substrates at 1.25 V vs. NHE in 0.5 M phosphate buffer solution. The black dots and red line indicated experimental data and fitting result using our proposed circuit model. (b) The values for physical parameters ( $R_{tr}$ ,  $R_{int}$  and  $C_{int}$ ) from fitting with our circuit model.

| Nature of Mn-oxide                             | Preparation method                            | Mass of electroactive materials (mg/cm <sup>2</sup> ) | Electrolyte                           | Capacitance (F/g) | Reference        |
|------------------------------------------------|-----------------------------------------------|-------------------------------------------------------|---------------------------------------|-------------------|------------------|
| <b>p-MnO NPs</b>                               | <b>Spin-coating</b>                           | <b>0.24</b>                                           | <b>0.5 M PBS</b>                      | <b>8.97</b>       | <b>This work</b> |
| Mn <sub>3</sub> O <sub>4</sub> film            | Electrostatic spray deposition                | 0.116                                                 | 0.1 M Na <sub>2</sub> SO <sub>4</sub> | 150               | Ref. 1           |
| Mn <sub>3</sub> O <sub>4</sub> film            | Chemical bath deposition                      | 0.57                                                  | 1 M Na <sub>2</sub> SO <sub>4</sub>   | 193               | Ref. 2           |
| MwCNT/Mn <sub>3</sub> O <sub>4</sub> film      | Dip-casting method                            | 10.1                                                  | 0.5 M Na <sub>2</sub> SO <sub>4</sub> | 143               | Ref. 3           |
| Graphene/Mn <sub>3</sub> O <sub>4</sub> powder | Hydrothermal                                  | 2.0                                                   | 1 M Na <sub>2</sub> SO <sub>4</sub>   | 114               | Ref. 4           |
|                                                | Precipitation from MnO <sub>2</sub> organosol | 0.75                                                  | 1 M Na <sub>2</sub> SO <sub>4</sub>   | 175               | Ref. 5           |

**Table S1.** Summary for reported capacitance for several Mn-oxide electrodes.



## References

1. Nam, K.-W.; Kim, K.-B., Manganese oxide film electrodes prepared by electrostatic spray deposition for electrochemical capacitors. *J. Electrochem. Soc.* **2006**, *153* (1), A81-A88, DOI 10.1149/1.2131821.
2. Jang, K.; Lee, S.-w.; Yu, S.; Salunkhe, R. R.; Chung, I.; Choi, S.; Ahn, H., Facile Low-temperature Chemical Synthesis and Characterization of a Manganese Oxide/multi-walled Carbon Nanotube Composite for Supercapacitor Applications. *Bull. Korean Chem. Soc* **2014**, *35* (10), 2975, DOI 10.5012/bkcs2014.35.10.2974.
3. Cui, X.; Hu, F.; Wei, W.; Chen, W., Dense and long carbon nanotube arrays decorated with  $\text{Mn}_3\text{O}_4$  nanoparticles for electrodes of electrochemical supercapacitors. *Carbon* **2011**, *49* (4), 1225-1234, DOI 10.1016/j.carbon.2010.11.039.
4. Lee, J. W.; Hall, A. S.; Kim, J.-D.; Mallouk, T. E., A facile and template-free hydrothermal synthesis of  $\text{Mn}_3\text{O}_4$  nanorods on graphene sheets for supercapacitor electrodes with long cycle stability. *Chem. Mater.* **2012**, *24* (6), 1158-1164, DOI 10.1021/cm203697w.
5. Wang, B.; Park, J.; Wang, C.; Ahn, H.; Wang, G.,  $\text{Mn}_3\text{O}_4$  nanoparticles embedded into graphene nanosheets: preparation, characterization, and electrochemical properties for supercapacitors. *Electrochimica Acta* **2010**, *55* (22), 6812-6817, DOI 10.1016/j.electacta.2010.05.086.
